# Supplementary material for: The neutrophil-lymphocyte ratio is associated with postoperative mortality of cardiac surgery
Source: PubMed Central journal article supplement — J Thorac Dis. 2021 Jan;13(1):67–75. doi: 10.21037/jtd-20-2593 (PMC7867821; doi:10.21037/jtd-20-2593), 2021-01
Supplement: jtd-13-01-67-dss.pdf [file jtd-13-01-67-dss.pdf]

## Data Sharing Statement

|                     |                                                                                                                                                    |                                                                                            |
|---------------------|----------------------------------------------------------------------------------------------------------------------------------------------------|--------------------------------------------------------------------------------------------|
| <b>Article Info</b> | <a href="http://dx.doi.org/10.21037/jtd-20-2593">http://dx.doi.org/10.21037/jtd-20-2593</a> .                                                      |                                                                                            |
| <b>Item</b>         | <b>Question</b>                                                                                                                                    | <b>Authors' Response<br/>(place "-" if not applicable)</b>                                 |
| 1                   | Would you like to share data collected for your study to others?                                                                                   | YES                                                                                        |
| 2                   | If not, would you like to share the reason for your decision?                                                                                      | -                                                                                          |
| 3                   | What data in particular will be shared?                                                                                                            | ALL                                                                                        |
| 4                   | Any other documents will be share? Such as study protocol, statistical analysis plan, informed consent form, clinical study report, analytic code. | Statistical analysis plan                                                                  |
| 5                   | When will data availability begin?                                                                                                                 | From the publication date                                                                  |
| 6                   | When will data availability end?                                                                                                                   | Two years within the publication date                                                      |
| 7                   | To whom will you share the data?                                                                                                                   | ALL                                                                                        |
| 8                   | For what type of analysis or purpose?                                                                                                              | ALL TYPE                                                                                   |
| 9                   | How or where can the data/documents be obtained?                                                                                                   | Emails could be sent to the address below to obtain the shared data: wangxiaowein1@163.com |
| 10                  | Any other restrictions?                                                                                                                            | No                                                                                         |
